# Supplementary material
Source: PubMed Central journal article supplement (PMC7484703)
Supplement: mmc1.pdf [file mmc1.pdf]

# The Coronavirus Disease 2019 Pandemic's Effect on Critical Care Resources and Health-Care Providers

## A Global Survey

*Sarah Wahlster, MD; Monisha Sharma, PhD; Ariane K. Lewis, MD; Pratik V. Patel, MD; Christiane S. Hartog, MD; Gemi Jannotta, PhD, ARNP; Patricia Blissitt, PhD, ARNP-CNS; Erin K. Kross, MD; Nicholas J. Kassebaum, MD; David M. Greer, MD, MA; J. Randall Curtis, MD, MPH; and Claire J. Creutzfeldt, MD*

CHEST 2021; 159(2):619-633

*Online supplements are not copyedited prior to posting and the author(s) take full responsibility for the accuracy of all data.*

© 2020 AMERICAN COLLEGE OF CHEST PHYSICIANS. Reproduction of this article is prohibited without written permission from the American College of Chest Physicians. See online for more details. DOI: 10.1016/j.chest.2020.09.070

**e-Figure 1:** Flow diagram of survey respondents

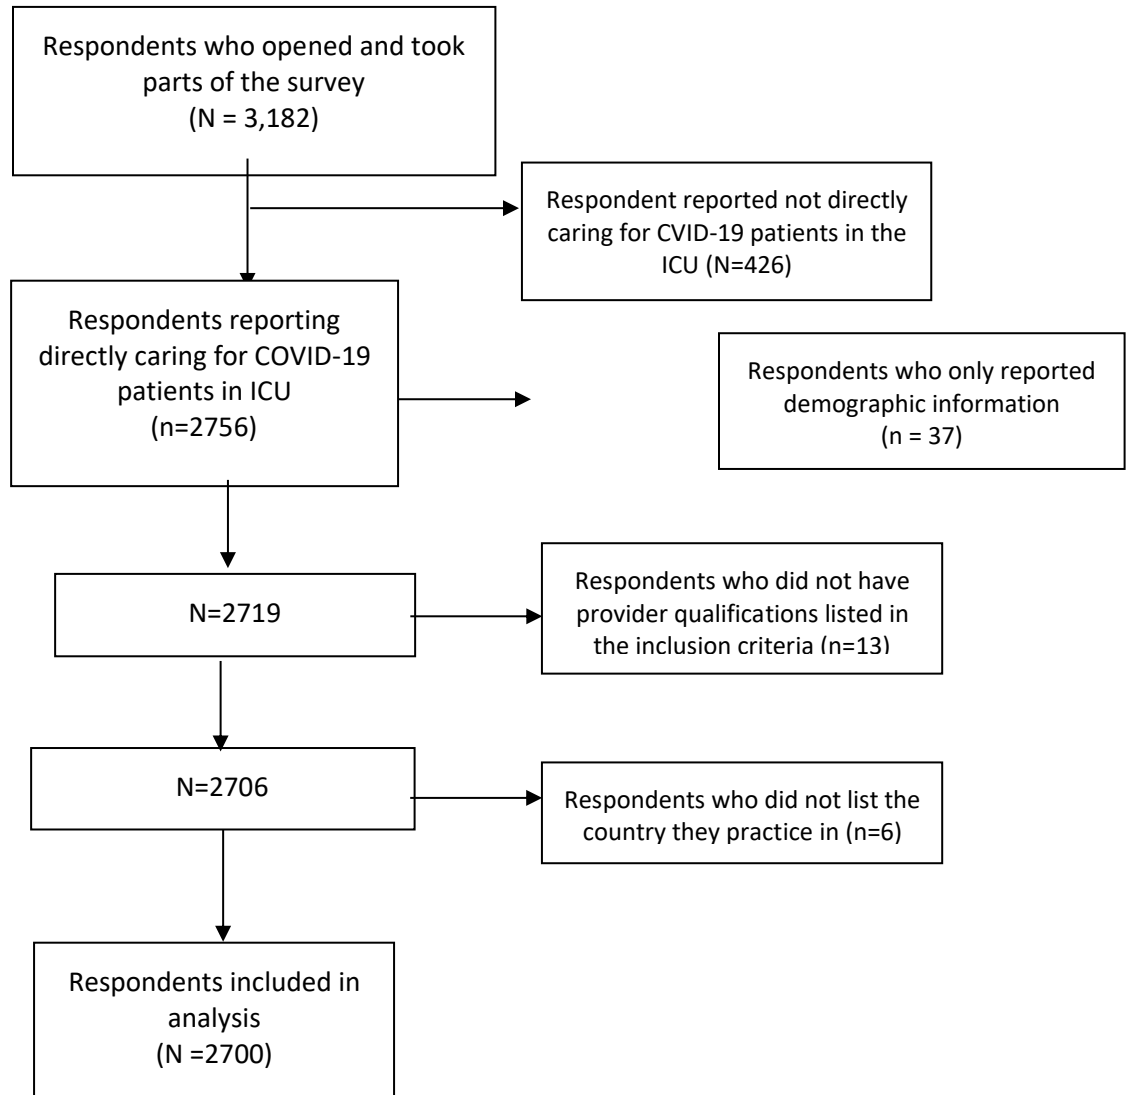

**e-Table 1:** Number of respondents per country, timing from COVID-19 peak and severity index by country<sub>s</sub>

| World Bank Region     | Country     | Number of respondents | Peak   | Daily death/ population (* 1,000,000,000) | Severity index |
|-----------------------|-------------|-----------------------|--------|-------------------------------------------|----------------|
| East Asia & Pacific   | Australia   | 88                    | 0      | 57.5                                      | 1              |
|                       | Hong Kong   | 3                     | 2      | 0.0                                       | 0              |
|                       | Indonesia   | 3                     | 2      | 69.0                                      | 1              |
|                       | Japan       | 104                   | 1      | 131.2                                     | 2              |
|                       | Malaysia    | 1                     | 2      | 24.7                                      | 1              |
|                       | Myanmar     | 3                     | 0      | 1.2                                       | 0              |
|                       | New Zealand | 13                    | 0      | 55.3                                      | 1              |
|                       | Philippines | 7                     | 2      | 135.7                                     | 2              |
|                       | Singapore   | 9                     | 0      | 91.2                                      | 1              |
|                       | South Korea | 7                     | 2      | 41.4                                      | 1              |
|                       | Taiwan      | 1                     | 0      | 0.0                                       | 0              |
|                       | Thailand    | 3                     | 2      | 4.8                                       | 0              |
|                       | Vanuatu     | 1                     | NA     |                                           |                |
| Europe & Central Asia | Albania     | 1                     | 0      | 92.7                                      | 1              |
|                       | Austria     | 4                     | 2      | 644.0                                     | 2              |
|                       | Belgium     | 14                    | 2      | 11073.1                                   | 3              |
|                       | Bulgaria    | 1                     | 1      | 307.0                                     | 2              |
|                       | Czechia     | 13                    | 2      | 373.5                                     | 2              |
|                       | Denmark     | 7                     | 2      | 1381.2                                    | 3              |
|                       | Estonia     | 1                     | 2      | 552.8                                     | 2              |
|                       | Finland     | 7                     | 1      | 998.7                                     | 2              |
|                       | France      | 8                     | 2      | 4212.0                                    | 3              |
|                       | Germany     | 57                    | 2      | 1445.8                                    | 3              |
|                       | Greece      | 1                     | 2      | 147.1                                     | 2              |
|                       | Hungary     | 1                     | 2      | 993.8                                     | 2              |
|                       | Ireland     | 16                    | 1      | 8222.3                                    | 3              |
|                       | Italy       | 103                   | 2      | 4861.5                                    | 3              |
|                       | Luxembourg  | 1                     | 2      | 1810.5                                    | 3              |
|                       | Netherlands | 10                    | 2      | 4322.6                                    | 3              |
|                       | Norway      | 18                    | 2      | 282.8                                     | 2              |
| Poland                | 1           | 1                     | 530.2  | 2                                         |                |
| Portugal              | 4           | 2                     | 1863.3 | 3                                         |                |



# CHEST™ Online Supplement

|                                       |                          |      |   |        |   |
|---------------------------------------|--------------------------|------|---|--------|---|
|                                       | Russia                   | 8    | 0 | 488.8  | 2 |
|                                       | Slovenia                 | 2    | 2 | 641.4  | 2 |
|                                       | Spain                    | 29   | 2 | 5579.5 | 3 |
|                                       | Sweden                   | 35   | 1 | 6726.6 | 3 |
|                                       | Switzerland              | 9    | 2 | 2010.5 | 3 |
|                                       | Turkey                   | 8    | 1 | 909.0  | 2 |
|                                       | United Kingdom           | 271  | 2 | 8669.4 | 3 |
| <b>Latin America &amp; Caribbean</b>  | Argentina                | 2    | 1 | 172.6  | 2 |
|                                       | Bolivia                  | 1    | 0 | 337.0  | 2 |
|                                       | Brazil                   | 6    | 0 | 1837.6 | 3 |
|                                       | Chile                    | 11   | 1 | 408.0  | 2 |
|                                       | Colombia                 | 2    | 0 | 251.6  | 2 |
|                                       | Costa Rica               | 2    | 0 | 0.0    | 0 |
|                                       | Cuba                     | 1    | 0 | 176.6  | 2 |
|                                       | Dominican Rep.           | 2    | 2 | 408.1  | 2 |
|                                       | Ecuador                  | 3    | 2 | 4133.8 | 3 |
|                                       | Honduras                 | 1    | 0 | 390.4  | 2 |
|                                       | Jamaica                  | 1    | 0 | 67.5   | 1 |
|                                       | Mexico                   | 2    | 1 | 978.3  | 2 |
|                                       | Panama                   | 2    | 1 | 1220.5 | 3 |
|                                       | Paraguay                 | 1    | 0 | 9.3    | 0 |
|                                       | Peru                     | 6    | 0 | 2133.1 | 3 |
|                                       | Turks and Caicos Islands | 1    | 0 | 0.0    | 0 |
|                                       | Uruguay                  | 1    | 0 | 96.0   | 1 |
| <b>Middle East &amp; North Africa</b> | Algeria                  | 1    | 2 | 115.5  | 2 |
|                                       | Egypt                    | 1    | 0 | 127.0  | 2 |
|                                       | Iran                     | 34   | 2 | 797.7  | 2 |
|                                       | Israel                   | 5    | 2 | 369.7  | 2 |
|                                       | Kuwait                   | 3    | 0 | 468.3  | 2 |
|                                       | Lebanon                  | 1    | 0 | 29.3   | 1 |
|                                       | Malta                    | 1    | 1 | 301.7  | 2 |
|                                       | Oman                     | 1    | 0 | 78.3   | 1 |
|                                       | Qatar                    | 1    | 0 | 46.3   | 1 |
|                                       | Saudi Arabia             | 2    | 0 | 187.7  | 2 |
| <b>North America</b>                  | Canada                   | 40   | 1 | 4062.7 | 3 |
|                                       | United States of America | 1653 | 2 | 5224.1 | 3 |
| <b>South Asia</b>                     | Afghanistan              | 2    | 0 | 109.6  | 2 |

Online supplements are not copyedited prior to posting and the author(s) take full responsibility for the accuracy of all data.

|                           |                 |    |   |       |   |
|---------------------------|-----------------|----|---|-------|---|
|                           | Bangladesh      | 3  | 0 | 29.1  | 1 |
|                           | India           | 17 | 0 | 56.4  | 1 |
|                           | Pakistan        | 5  | 0 | 105.0 | 2 |
| <b>Sub-Saharan Africa</b> | Dem. Rep. Congo | 1  | 0 | 11.2  | 1 |
|                           | Ethiopia        | 1  | 0 | 0.6   | 0 |
|                           | Kenya           | 1  | 0 | 18.6  | 1 |
|                           | Nigeria         | 2  | 0 | 24.6  | 1 |
|                           | South Africa    | 4  | 0 | 96.7  | 1 |

§ Peak was defined as mortality rates based on projections from IHME and JHU, using a 3 day rolling average (0: pre-peak, 1: during peak, 2: post-peak). The Severity Index is a logarithmic scale calculated as the daily death rate (averaging the cumulative deaths during survey distribution)/population \* 10<sup>9</sup> (0: 0-9, 1: 10-99, 2: 100-999, 3: 1000 and higher).

**e-Table 2a:** Number of countries in each peak category

| Category     | N countries | N responses |
|--------------|-------------|-------------|
| Pre-peak     | 33          | 186         |
| Peri-peak    | 13          | 229         |
| Post-peak    | 30          | 2259        |
| <b>Total</b> | <b>76</b>   | <b>2674</b> |

**e-Table 2b:** Number of countries in each severity category

| Category     | N countries | N responses |
|--------------|-------------|-------------|
| Severity 1   | 8           | 15          |
| Severity 2   | 18          | 153         |
| Severity 3   | 31          | 247         |
| Severity 4   | 19          | 2,259       |
| <b>Total</b> | <b>76</b>   | <b>2674</b> |

**e-Table 3: Specialization of respondents**

|                                                                   | <b>East Asia &amp; Pacific<br/>(N=243)</b> | <b>Europe &amp; Central Asia<br/>(N=630)</b> | <b>Latin America &amp; Caribbean<br/>(N=45)</b> | <b>Middle East &amp; North Africa<br/>(n=50)</b> | <b>North America<br/>(N=1696)</b> | <b>South Asia<br/>(N=27)</b> | <b>Sub-Saharan Africa<br/>(N=9)</b> | <b>Total<br/>(N=2700)</b> |
|-------------------------------------------------------------------|--------------------------------------------|----------------------------------------------|-------------------------------------------------|--------------------------------------------------|-----------------------------------|------------------------------|-------------------------------------|---------------------------|
| <b>Specialization area, physicians only (N = 907)</b>             |                                            |                                              |                                                 |                                                  |                                   |                              |                                     |                           |
| Critical Care Medicine                                            | 156 (86 %)                                 | 248 (84 %)                                   | 33 (97 %)                                       | 14 (48 %)                                        | 302 (89 %)                        | 16 (70 %)                    | 3 (50 %)                            | 772 (85 %)                |
| Pulmonology                                                       | 14 (8 %)                                   | 8 (3 %)                                      | 1 (3 %)                                         | 7 (24 %)                                         | 194 (57 %)                        | 1 (4 %)                      | 0 (0 %)                             | 225 (25 %)                |
| Anesthesiology                                                    | 38 (21 %)                                  | 181 (61 %)                                   | 2 (6 %)                                         | 5 (17 %)                                         | 17 (5 %)                          | 2 (9 %)                      | 3 (50 %)                            | 248 (27 %)                |
| Internal Medicine                                                 | 14 (8 %)                                   | 20 (7 %)                                     | 4 (12 %)                                        | 3 (10 %)                                         | 51 (15 %)                         | 7 (30 %)                     | 0 (0 %)                             | 99 (11 %)                 |
| Emergency Medicine                                                | 25 (14 %)                                  | 38 (13 %)                                    | 0 (0 %)                                         | 1 (3 %)                                          | 19 (6 %)                          | 1 (4 %)                      | 1 (17 %)                            | 85 (9 %)                  |
| <b>Specialization area, physicians in training only (N = 207)</b> |                                            |                                              |                                                 |                                                  |                                   |                              |                                     |                           |
| Critical Care Medicine                                            | 18 (86 %)                                  | 41 (68 %)                                    | 1 (50 %)                                        | 2 (18 %)                                         | 81 (74 %)                         | 1 (33 %)                     | 0 (0 %)                             | 144 (69 %)                |
| Pulmonology                                                       | 0 (0 %)                                    | 0 (0 %)                                      | 0 (0 %)                                         | 0 (0 %)                                          | 55 (50 %)                         | 1 (33 %)                     | 0 (0 %)                             | 56 (27 %)                 |
| Anesthesiology                                                    | 4 (19 %)                                   | 36 (60 %)                                    | 0 (0 %)                                         | 7 (64 %)                                         | 8 (7 %)                           | 2 (67 %)                     | 0 (0 %)                             | 57 (27 %)                 |
| Internal Medicine                                                 | 0 (0 %)                                    | 9 (15 %)                                     | 0 (0 %)                                         | 2 (18 %)                                         | 25 (23 %)                         | 1 (33 %)                     | 0 (0 %)                             | 37 (18 %)                 |
| Emergency Medicine                                                | 6 (29 %)                                   | 7 (12 %)                                     | 1 (50 %)                                        | 0 (0 %)                                          | 5 (5 %)                           | 1 (33 %)                     | 0 (0 %)                             | 20 (10 %)                 |
| Pediatrics                                                        | 0 (0 %)                                    | 0 (0 %)                                      | 0 (0 %)                                         | 0 (0 %)                                          | 6 (6 %)                           | 0 (0 %)                      | 2 (100 %)                           | 8 (4 %)                   |
| <b>Specialization area, nurses only (N = 1077)</b>                |                                            |                                              |                                                 |                                                  |                                   |                              |                                     |                           |
| Medical ICU                                                       | 23 (66 %)                                  | 156 (58 %)                                   | 0 (0 %)                                         | 4 (44 %)                                         | 560 (58 %)                        | 1 (100 %)                    | 0 (0 %)                             | 744 (58 %)                |
| Cardiac ICU                                                       | 14 (40 %)                                  | 68 (25 %)                                    | 0 (0 %)                                         | 0 (0 %)                                          | 260 (27 %)                        | 0 (0 %)                      | 0 (0 %)                             | 342 (27 %)                |
| Neuro ICU                                                         | 8 (23 %)                                   | 128 (47 %)                                   | 0 (0 %)                                         | 5 (56 %)                                         | 178 (18 %)                        | 0 (0 %)                      | 0 (0 %)                             | 319 (25 %)                |
| Surgical ICU                                                      | 3 (9 %)                                    | 48 (18 %)                                    | 0 (0 %)                                         | 0 (0 %)                                          | 305 (31 %)                        | 0 (0 %)                      | 0 (0 %)                             | 356 (28 %)                |
| Non-ICU                                                           | 0 (0 %)                                    | 61 (10 %)                                    | 0 (0 %)                                         | 0 (0 %)                                          | 120 (7 %)                         | 0 (0 %)                      | 1 (11 %)                            | 182 (7 %)                 |

**e-Table 4:** Provider responses by region (full table)<sup>†</sup>

|                                                  | East Asia & Pacific (N=243) | Europe & Central Asia (N=630) | Latin America & Caribbean (N=45) | Middle East & North Africa (N=50) | North America (N=1696) | South Asia (N=27) | Sub-Saharan Africa (N=9) | Total (N=2700) |
|--------------------------------------------------|-----------------------------|-------------------------------|----------------------------------|-----------------------------------|------------------------|-------------------|--------------------------|----------------|
| <b>Perceived lack of ICU resources by region</b> |                             |                               |                                  |                                   |                        |                   |                          |                |
| Shortages reported                               |                             |                               |                                  |                                   |                        |                   |                          |                |
| Intensivists                                     | 40 (18 %)                   | 115 (20 %)                    | 15 (37 %)                        | 13 (29 %)                         | 191 (12 %)             | 7 (30 %)          | 4 (50 %)                 | 385 (15 %)     |
| ICU Nurses                                       | 52 (24 %)                   | 277 (47 %)                    | 15 (37 %)                        | 14 (31 %)                         | 432 (27 %)             | 13 (57 %)         | 3 (38 %)                 | 806 (32 %)     |
| ICU beds                                         | 25 (13 %)                   | 63 (13 %)                     | 11 (34 %)                        | 10 (29 %)                         | 150 (11 %)             | 10 (50 %)         | 3 (50 %)                 | 272 (13 %)     |
| COVID-19 testing                                 |                             |                               |                                  |                                   |                        |                   |                          |                |
| Limited to select patients                       | 162 (76 %)                  | 336 (58 %)                    | 26 (67 %)                        | 27 (61 %)                         | 942 (61 %)             | 14 (61 %)         | 6 (75 %)                 | 1513 (62 %)    |
| Limited to select providers                      | 141 (66 %)                  | 407 (71 %)                    | 26 (67 %)                        | 27 (61 %)                         | 1142 (74 %)            | 14 (61 %)         | 5 (62 %)                 | 1762 (72 %)    |
| Ordering requires hospital approval              | 97 (45 %)                   | 257 (45 %)                    | 20 (51 %)                        | 24 (55 %)                         | 584 (38 %)             | 11 (48 %)         | 2 (25 %)                 | 995 (41 %)     |
| PPE availability limited                         |                             |                               |                                  |                                   |                        |                   |                          |                |
| Gloves                                           | 22 (10%)                    | 27(5%)                        | 4 (11 %)                         | 5 (11%)                           | 4 (3%)                 | 0 (0%)            | 2 (24%)                  | 101 (4%)       |
| Gowns                                            | 56 (26%)                    | 133 (24%)                     | 11 (29%)                         | 16 (37%)                          | 348 (24%)              | 8 (36%)           | 6 (75%)                  | 578 (24%)      |
| Surgical Mask                                    | 34 (16%)                    | 70 (12%)                      | 4 (10%)                          | 6 (14%)                           | 201 (14%)              | 1(5%)             | 4 (50%)                  | 320 (13%)      |
| Eye protection                                   | 95 (45%)                    | 213 (38%)                     | 18 (47%)                         | 22 (51%)                          | 561 (37%)              | 13 (59%)          | 7 (87%)                  | 929 (39%)      |
| Face Shield                                      | 117 (57%)                   | 256 (45%)                     | 20 (53%)                         | 23 (54%)                          | 627 (42%)              | 11 (50%)          | 6 (75%)                  | 1050 (44%)     |
| N95                                              | 127 (60%)                   | 285 (53%)                     | 17 (45%)                         | 26 (61%)                          | 877 (58%)              | 14 (64%)          | 6(75%)                   | 1362 (57%)     |
| PAPRs                                            | 80 (38%)                    | 147 (27%)                     | 9 (24%)                          | 13 (31%)                          | 825 (55%)              | 1 (5)             | 0 (0%)                   | 1075 (46%)     |
| Agreement with hospital PPE policy               |                             |                               |                                  |                                   |                        |                   |                          |                |

*Online supplements are not copyedited prior to posting and the author(s) take full responsibility for the accuracy of all data.*

# CHEST™ Online Supplement

|                                                              |                     |            |           |           |             |           |          |             |
|--------------------------------------------------------------|---------------------|------------|-----------|-----------|-------------|-----------|----------|-------------|
| Agree completely                                             | 96 (45 %)           | 204 (37 %) | 22 (58 %) | 19 (44 %) | 406 (27 %)  | 13 (59 %) | 2 (25 %) | 762 (32 %)  |
| Agree somewhat                                               | 91 (43 %)           | 248 (45 %) | 15 (39 %) | 16 (37 %) | 689 (46 %)  | 7 (32 %)  | 3 (38 %) | 1069 (45 %) |
| Disagree somewhat                                            | 20 (9 %)            | 82 (15 %)  | 0 (0 %)   | 5 (12 %)  | 252 (17 %)  | 2 (9 %)   | 2 (25 %) | 363 (15 %)  |
| Disagree completely                                          | 5 (2 %)             | 22 (4 %)   | 1 (3 %)   | 3 (7 %)   | 148 (10 %)  | 0 (0 %)   | 1 (12 %) | 180 (8 %)   |
| <b>Ventilator supplies limited</b>                           |                     |            |           |           |             |           |          |             |
| Mechanical ventilators                                       | 21 (10 %)           | 87 (17 %)  | 11 (31 %) | 13 (34 %) | 102 (7 %)   | 6 (27 %)  | 3 (43 %) | 243 (11 %)  |
| NIPPV                                                        | 29 (14 %)           | 156 (30 %) | 20 (57 %) | 15 (38 %) | 239 (17 %)  | 10 (45 %) | 3 (43 %) | 472 (21 %)  |
| HFNC                                                         | 29 (14 %)           | 189 (37 %) | 15 (43 %) | 14 (37 %) | 271 (19 %)  | 9 (41 %)  | 0 (0 %)  | 527 (23 %)  |
| <b>Treatment strategies used for COVID-19 patients</b>       |                     |            |           |           |             |           |          |             |
| Proning                                                      | 144 (59 %)          | 502 (80 %) | 31 (69 %) | 19 (38 %) | 1373 (81 %) | 16 (59 %) | 4 (44 %) | 2089 (77 %) |
| ECMO                                                         | 74 (30 %)           | 187 (30 %) | 5 (11 %)  | 11 (22 %) | 671 (40 %)  | 1 (4 %)   | 1 (11 %) | 950 (35 %)  |
| Drugs under investigation                                    | 121 (50 %)          | 387 (61 %) | 17 (38 %) | 28 (56 %) | 1208 (71 %) | 17 (63 %) | 4 (44 %) | 1782 (66 %) |
| Renal replacement therapy                                    | 131 (54 %)          | 467 (74 %) | 25 (56 %) | 20 (40 %) | 1106 (65 %) | 14 (52 %) | 4 (44 %) | 1767 (65 %) |
| <b>Changes in Resource Utilization and Provider Concerns</b> |                     |            |           |           |             |           |          |             |
| Limiting mechanical ventilation                              | 32 (16 %)<br>(31 %) | 161        | 7 (20 %)  | 13 (33 %) | 140 (10 %)  | 7 (32 %)  | 2 (29 %) | 362 (16 %)  |
| <b>CPR policy changes</b>                                    |                     |            |           |           |             |           |          |             |
| Unchanged                                                    | 59 (29 %)           | 210 (41 %) | 12 (34 %) | 16 (41 %) | 460 (32 %)  | 7 (32 %)  | 2 (29 %) | 766 (34 %)  |
| New policy implemented                                       | 83 (41 %)           | 198 (38 %) | 11 (31 %) | 12 (31 %) | 547 (38 %)  | 5 (23 %)  | 2 (29 %) | 858 (38 %)  |
| No policy change but practice has changed                    | 59 (29 %)           | 109 (21 %) | 12 (34 %) | 11 (28 %) | 421 (29 %)  | 10 (45 %) | 3 (43 %) | 625 (28 %)  |
| <b>CPR in COVID-19 patients</b>                              |                     |            |           |           |             |           |          |             |

Online supplements are not copyedited prior to posting and the author(s) take full responsibility for the accuracy of all data.





|                                                                           |            |            |           |           |             |           |          |             |
|---------------------------------------------------------------------------|------------|------------|-----------|-----------|-------------|-----------|----------|-------------|
| Not performed                                                             | 18 (9 %)   | 19 (4 %)   | 7 (20 %)  | 4 (10 %)  | 17 (1 %)    | 5 (23 %)  | 4 (57 %) | 74 (3 %)    |
| Physicians determine                                                      | 123 (61 %) | 368 (71 %) | 21 (60 %) | 22 (56 %) | 450 (32 %)  | 15 (68 %) | 3 (43 %) | 1002 (45 %) |
| Families determine                                                        | 60 (30 %)  | 130 (25 %) | 7 (20 %)  | 13 (33 %) | 961 (67 %)  | 2 (9 %)   | 0 (0 %)  | 1173 (52 %) |
| Allow families to participate in critical decisions for COVID-19 patients |            |            |           |           |             |           |          |             |
| More than other ICU patients                                              | 14 (7 %)   | 17 (3 %)   | 1 (3 %)   | 5 (13 %)  | 74 (5 %)    | 4 (18 %)  | 3 (43 %) | 118 (5 %)   |
| Same as other ICU patients                                                | 165 (82 %) | 386 (75 %) | 24 (71 %) | 25 (64 %) | 1189 (84 %) | 13 (59 %) | 3 (43 %) | 1805 (81 %) |
| Less than other ICU patients                                              | 21 (10 %)  | 112 (22 %) | 9 (26 %)  | 9 (23 %)  | 155 (11 %)  | 5 (23 %)  | 1 (14 %) | 312 (14 %)  |
| Palliative care consults for COVID-19 patients                            |            |            |           |           |             |           |          |             |
| > 50% of patients                                                         | 9 (5 %)    | 31 (6 %)   | 1 (3 %)   | 5 (14 %)  | 411 (30 %)  | 1 (5 %)   | 1 (17 %) | 459 (21 %)  |
| < 50% of patients                                                         | 42 (22 %)  | 111 (22 %) | 9 (26 %)  | 4 (11 %)  | 416 (31 %)  | 0 (0 %)   | 2 (33 %) | 584 (27 %)  |
| Do not consult palliative care                                            | 83 (44 %)  | 249 (50 %) | 11 (32 %) | 15 (43 %) | 105 (8 %)   | 7 (35 %)  | 1 (17 %) | 471 (22 %)  |
| No palliative care specialists available                                  | 19 (10 %)  | 59 (12 %)  | 9 (26 %)  | 7 (20 %)  | 48 (4 %)    | 11 (55 %) | 2 (33 %) | 155 (7 %)   |
| Not sure                                                                  | 36 (19 %)  | 48 (10 %)  | 4 (12 %)  | 4 (11 %)  | 376 (28 %)  | 1 (5 %)   | 0 (0 %)  | 469 (22 %)  |
| Palliative care consults                                                  |            |            |           |           |             |           |          |             |
| More than prior to pandemic                                               | 6 (12 %)   | 26 (18 %)  | 3 (30 %)  | 3 (33 %)  | 371 (45 %)  | 1 (100 %) | 1 (33 %) | 411 (39 %)  |
| Provider concerns                                                         |            |            |           |           |             |           |          |             |
| Emotional distress and burnout                                            | 73 (30 %)  | 305 (48 %) | 19 (42 %) | 22 (44 %) | 974 (57 %)  | 9 (33 %)  | 3 (33 %) | 1405 (52 %) |
| Worried about infecting family at home                                    | 122 (50 %) | 345 (55 %) | 21 (47 %) | 25 (50 %) | 1119 (66 %) | 17 (63 %) | 5 (56 %) | 1654 (61 %) |
| Worried about own health                                                  | 10 (31 %)  | 80 (50 %)  | 3 (43 %)  | 5 (38 %)  | 91 (65 %)   | 6 (86 %)  | 1 (50 %) | 196 (54 %)  |
| Social stigma from community                                              | 37 (15 %)  | 91 (14 %)  | 6 (13 %)  | 7 (14 %)  | 434 (26 %)  | 4 (15 %)  | 0 (0 %)  | 579 (21 %)  |
| Feel that hospital unable to keep me safe                                 | 36 (15 %)  | 107 (17 %) | 7 (16 %)  | 7 (14 %)  | 433 (26 %)  | 6 (22 %)  | 2 (22 %) | 598 (22 %)  |

Online supplements are not copyedited prior to posting and the author(s) take full responsibility for the accuracy of all data.



|                                      |           |            |           |           |            |           |          |             |
|--------------------------------------|-----------|------------|-----------|-----------|------------|-----------|----------|-------------|
| Poor communication from supervisors  | 30 (12%)  | 134 (21%)  | 3 (7%)    | 8 (16%)   | 366 (22%)  | 4 (15%)   | 2 (22%)  | 547 (20%)   |
| Worries about financial situation    | 20 (8%)   | 36 (6%)    | 11 (24%)  | 6 (12%)   | 212 (13%)  | 6 (22%)   | 0 (0%)   | 292 (11%)   |
| When not in the hospital, providers  |           |            |           |           |            |           |          |             |
| Live separately from family          | 24 (13 %) | 70 (15 %)  | 5 (17 %)  | 9 (27 %)  | 148 (11 %) | 3 (17 %)  | 0 (0 %)  | 259 (12 %)  |
| Completely isolate from family       | 3 (2 %)   | 16 (3 %)   | 0 (0 %)   | 3 (9 %)   | 40 (3 %)   | 0 (0 %)   | 0 (0 %)  | 62 (3 %)    |
| Partially isolate from family        | 33 (18 %) | 51 (11 %)  | 5 (17 %)  | 8 (24 %)  | 230 (17 %) | 3 (17 %)  | 1 (20 %) | 331 (16 %)  |
| Do not isolate but extra precautions | 80 (44 %) | 239 (50 %) | 16 (53 %) | 10 (30 %) | 745 (56 %) | 10 (56 %) | 4 (80 %) | 1104 (53 %) |
| No changes to before pandemic        | 40 (22 %) | 102 (21 %) | 4 (13 %)  | 3 (9 %)   | 170 (13 %) | 2 (11 %)  | 0 (0 %)  | 321 (15 %)  |

**e-Figure 2:** Provider reported reactions to insufficient ICU beds

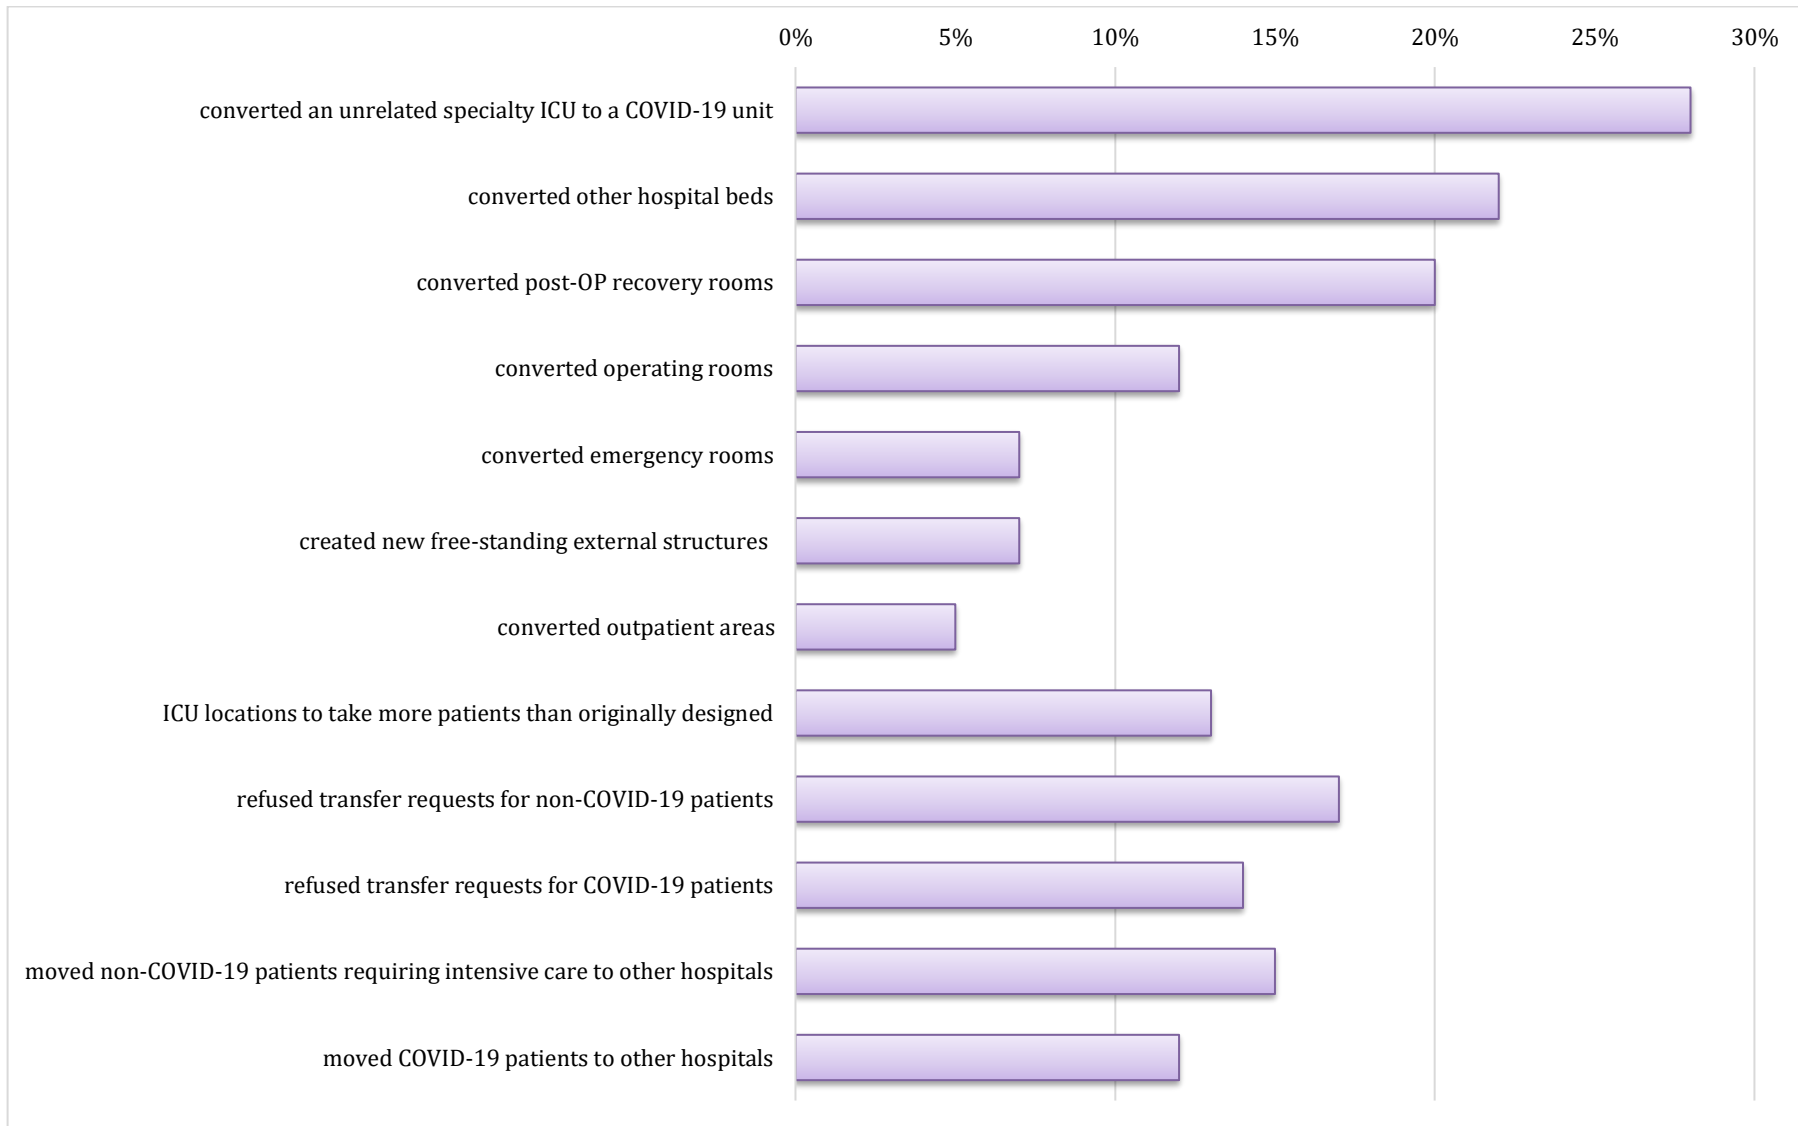

**e-Table 5:** Responses stratified by provider type.

|                                              | <b>APP<br/>(N=212)</b> | <b>Doctor<br/>(N=907)</b> | <b>Doctor in<br/>training<br/>(N=207)</b> | <b>Nurse<br/>(N=1082)</b> | <b>RT<br/>(N=297)</b> | <b>Overall<br/>(N=2706)</b> |
|----------------------------------------------|------------------------|---------------------------|-------------------------------------------|---------------------------|-----------------------|-----------------------------|
| <b>Number of COVID-19 patients cared for</b> |                        |                           |                                           |                           |                       |                             |
| < 10                                         | 67 (32 %)              | 420 (46 %)                | 62 (30 %)                                 | 487 (45 %)                | 92 (31 %)             | 1128 (42 %)                 |
| 10 - 50                                      | 109 (51 %)             | 369 (41 %)                | 110 (53 %)                                | 521 (48 %)                | 165 (56 %)            | 1275 (47 %)                 |
| > 50                                         | 36 (17 %)              | 118 (13 %)                | 35 (17 %)                                 | 73 (7 %)                  | 40 (13 %)             | 302 (11 %)                  |
| <b>Hospital setting</b>                      |                        |                           |                                           |                           |                       |                             |
| Rural, <100 beds                             | 4 (2 %)                | 10 (1 %)                  | 2 (1 %)                                   | 24 (2 %)                  | 9 (3 %)               | 49 (2 %)                    |
| Rural, ≥100 beds                             | 6 (3 %)                | 32 (4 %)                  | 3 (1 %)                                   | 76 (7 %)                  | 15 (5 %)              | 133 (5 %)                   |
| Urban, no teaching, <200 beds                | 11 (5 %)               | 30 (3 %)                  | 6 (3 %)                                   | 64 (6 %)                  | 11 (4 %)              | 122 (5 %)                   |
| Urban, no teaching, ≥200 beds                | 26 (12 %)              | 86 (9 %)                  | 8 (4 %)                                   | 197 (18 %)                | 36 (12 %)             | 353 (13 %)                  |
| Urban, teaching, <200 beds                   | 10 (5 %)               | 54 (6 %)                  | 5 (2 %)                                   | 53 (5 %)                  | 9 (3 %)               | 131 (5 %)                   |
| Urban, teaching, ≥200 beds                   | 155 (73 %)             | 695 (77 %)                | 183 (88 %)                                | 666 (62 %)                | 217 (73 %)            | 1916 (71 %)                 |
| <b>Gender</b>                                |                        |                           |                                           |                           |                       |                             |
| Female                                       | 166 (78 %)             | 332 (37 %)                | 110 (53 %)                                | 955 (88 %)                | 209 (70 %)            | 1773 (66 %)                 |
| Male                                         | 46 (22 %)              | 566 (62 %)                | 94 (45 %)                                 | 119 (11 %)                | 83 (28 %)             | 908 (34 %)                  |
| Non-binary                                   | 0 (0 %)                | 4 (0 %)                   | 0 (0 %)                                   | 2 (0 %)                   | 0 (0 %)               | 6 (0 %)                     |
| Not disclosed                                | 0 (0 %)                | 5 (1 %)                   | 3 (1 %)                                   | 6 (1 %)                   | 5 (2 %)               | 19 (1 %)                    |
| <b>Qualification</b>                         |                        |                           |                                           |                           |                       |                             |
| ICU director                                 | 0 (0 %)                | 241 (27 %)                | 0 (0 %)                                   | 0 (0 %)                   | 0 (0 %)               | 241 (9 %)                   |
| Attending Physician                          | 0 (0 %)                | 666 (73 %)                | 0 (0 %)                                   | 0 (0 %)                   | 0 (0 %)               | 666 (25 %)                  |
| Fellow/Resident                              | 0 (0 %)                | 0 (0 %)                   | 207 (100 %)                               | 0 (0 %)                   | 0 (0 %)               | 207 (8 %)                   |
| Nurse manager                                | 0 (0 %)                | 0 (0 %)                   | 0 (0 %)                                   | 53 (5 %)                  | 0 (0 %)               | 53 (2 %)                    |
| Nurse                                        | 0 (0 %)                | 0 (0 %)                   | 0 (0 %)                                   | 960 (89 %)                | 0 (0 %)               | 960 (35 %)                  |
| Clinical nurse specialist                    | 0 (0 %)                | 0 (0 %)                   | 0 (0 %)                                   | 69 (6 %)                  | 0 (0 %)               | 69 (3 %)                    |

*Online supplements are not copyedited prior to posting and the author(s) take full responsibility for the accuracy of all data.*



|                                                 |             |             |             |             |             |             |
|-------------------------------------------------|-------------|-------------|-------------|-------------|-------------|-------------|
| Advanced Practice provider                      | 212 (100 %) | 0 (0 %)     | 0 (0 %)     | 0 (0 %)     | 0 (0 %)     | 212 (8 %)   |
| Respiratory therapist                           | 0 (0 %)     | 0 (0 %)     | 0 (0 %)     | 0 (0 %)     | 297 (100 %) | 297 (11 %)  |
| <b>Years in clinical practice</b>               |             |             |             |             |             |             |
| Mean (SD)                                       | 11.4 (9.04) | 18.2 (8.84) | 5.26 (2.73) | 11.2 (9.59) | 13.4 (10.1) | 13.3 (9.80) |
| Insufficient Intensivists                       | 37 (19 %)   | 147 (17 %)  | 38 (20 %)   | 146 (15 %)  | 17 (6 %)    | 385 (15 %)  |
| Insufficient Nurses                             | 80 (41 %)   | 232 (27 %)  | 62 (32 %)   | 379 (38 %)  | 55 (21 %)   | 808 (32 %)  |
| Insufficient Space                              | 20 (12 %)   | 108 (14 %)  | 18 (11 %)   | 105 (13 %)  | 21 (10 %)   | 272 (13 %)  |
| <b>Agreement with PPE policy</b>                |             |             |             |             |             |             |
| Agree completely                                | 45 (25 %)   | 392 (48 %)  | 72 (39 %)   | 177 (19 %)  | 77 (31 %)   | 763 (32 %)  |
| Agree somewhat                                  | 103 (56 %)  | 343 (42 %)  | 76 (41 %)   | 441 (47 %)  | 108 (44 %)  | 1071 (45 %) |
| Disagree somewhat                               | 26 (14 %)   | 76 (9 %)    | 28 (15 %)   | 196 (21 %)  | 39 (16 %)   | 365 (15 %)  |
| Disagree completely                             | 9 (5 %)     | 10 (1 %)    | 10 (5 %)    | 127 (13 %)  | 24 (10 %)   | 180 (8 %)   |
| Limiting Mechanical ventilation                 | 22 (13 %)   | 155 (19 %)  | 35 (21 %)   | 120 (14 %)  | 30 (13 %)   | 362 (16 %)  |
| <b>CPR policy changes</b>                       |             |             |             |             |             |             |
| Unchanged                                       | 57 (34 %)   | 313 (39 %)  | 44 (26 %)   | 288 (33 %)  | 68 (29 %)   | 770 (34 %)  |
| New policy implemented                          | 63 (37 %)   | 290 (36 %)  | 78 (46 %)   | 312 (36 %)  | 115 (48 %)  | 858 (38 %)  |
| No policy change but practice has changed       | 50 (29 %)   | 197 (25 %)  | 46 (27 %)   | 278 (32 %)  | 55 (23 %)   | 626 (28 %)  |
| <b>CPR practice</b>                             |             |             |             |             |             |             |
| None                                            | 3 (2 %)     | 45 (6 %)    | 4 (2 %)     | 21 (2 %)    | 2 (1 %)     | 75 (3 %)    |
| Physicians determine                            | 73 (43 %)   | 442 (55 %)  | 90 (54 %)   | 326 (37 %)  | 71 (30 %)   | 1002 (44 %) |
| Families determine                              | 94 (55 %)   | 313 (39 %)  | 74 (44 %)   | 531 (60 %)  | 165 (69 %)  | 1177 (52 %) |
| <b>Provider concerns</b>                        |             |             |             |             |             |             |
| Insufficient access to PPE                      | 75 (35 %)   | 253 (28 %)  | 59 (29 %)   | 459 (42 %)  | 103 (35 %)  | 949 (35 %)  |
| poor communication from my supervisors          | 44 (21 %)   | 111 (12 %)  | 35 (17 %)   | 289 (27 %)  | 68 (23 %)   | 547 (20 %)  |
| Worries about my own health                     | 91 (43 %)   | 323 (36 %)  | 88 (43 %)   | 556 (51 %)  | 140 (47 %)  | 1198 (44 %) |
| Worries about transmitting disease to my family | 126 (59 %)  | 527 (58 %)  | 127 (61 %)  | 695 (64 %)  | 180 (61 %)  | 1655 (61 %) |
| Social Stigma from my community                 | 40 (19 %)   | 105 (12 %)  | 44 (21 %)   | 308 (28 %)  | 83 (28 %)   | 580 (21 %)  |

Online supplements are not copyedited prior to posting and the author(s) take full responsibility for the accuracy of all data.



# CHEST™ Online Supplement

|                                                  |            |            |           |            |            |             |
|--------------------------------------------------|------------|------------|-----------|------------|------------|-------------|
| Emotional Distress and burnout                   | 116 (55 %) | 383 (42 %) | 86 (42 %) | 659 (61 %) | 162 (55 %) | 1406 (52 %) |
| No concerns                                      | 7 (3 %)    | 84 (9 %)   | 11 (5 %)  | 18 (2 %)   | 11 (4 %)   | 131 (5 %)   |
| <b>Living situation</b>                          |            |            |           |            |            |             |
| Live separately from my family                   | 18 (11 %)  | 93 (12 %)  | 29 (19 %) | 92 (12 %)  | 27 (13 %)  | 259 (12 %)  |
| Completely isolate from family members at home   | 2 (1 %)    | 22 (3 %)   | 7 (4 %)   | 23 (3 %)   | 8 (4 %)    | 62 (3 %)    |
| Partially isolate from family members at home    | 20 (12 %)  | 130 (17 %) | 21 (13 %) | 118 (15 %) | 42 (20 %)  | 331 (16 %)  |
| Don't isolate but take extra precautions         | 92 (57 %)  | 370 (50 %) | 71 (46 %) | 455 (57 %) | 117 (54 %) | 1105 (53 %) |
| Have not changed anything about my personal life | 29 (18 %)  | 132 (18 %) | 28 (18 %) | 112 (14 %) | 21 (10 %)  | 322 (15 %)  |

**e-Table 6:** List of Reported Institutions by country and number of respondents per institutions

| Country                             | Institution                                  | Number of Respondents |
|-------------------------------------|----------------------------------------------|-----------------------|
| <b>Australia</b>                    | Austin Health                                | 1                     |
|                                     | Bendigo hospital                             | 1                     |
|                                     | Cabrini Private Hospital                     | 1                     |
|                                     | Eastern Health                               | 1                     |
|                                     | Fiona Stanley Hospital                       | 1                     |
|                                     | Port Macquarie base Hospital                 | 1                     |
|                                     | Launceston                                   | 1                     |
|                                     | Monash Medical Centre                        | 2                     |
|                                     | Nepean Hospital                              | 1                     |
|                                     | Queensland Children's Hospital               | 1                     |
|                                     | Royal Adelaide Hospital                      | 3                     |
|                                     | Royal Brisbane and Women's Hospital          | 1                     |
|                                     | Royal Hobart Hospital                        | 1                     |
|                                     | Royal Melbourne Hospital                     | 5                     |
|                                     | Royal North Shore hospital                   | 2                     |
|                                     | Royal Prince Alfred Hospital, Sydney         | 1                     |
| The Children's Hospital at Westmead | 1                                            |                       |
| Wagga Wagga Base Hospital           | 1                                            |                       |
| <b>Austria</b>                      | KABEG Klagenfurt                             | 1                     |
| <b>Bangladesh</b>                   | Kuwait Moitry Bangladesh Friendship Hospital | 1                     |
|                                     | United Hospital                              | 1                     |
| <b>Belgium</b>                      | Ghent University Hospital                    | 3                     |
|                                     | University Hospitals Leuven                  | 1                     |
| <b>Bolivia</b>                      | Hospital de Japonés                          | 1                     |
| <b>Brazil</b>                       | Hospital Brasilia                            | 1                     |
|                                     | Hospital Israelita Albert Einstein           | 1                     |
|                                     | University of Sao Paola                      | 1                     |
| <b>Canada</b>                       | Community hospital                           | 1                     |
|                                     | Hamilton Health Sciences                     | 1                     |
|                                     | Hopital Montfort                             | 1                     |
|                                     | Ross Memorial Hospital                       | 1                     |
|                                     | Sunnybrook Health Sciences Centre            | 1                     |



# CHEST™ Online Supplement

|                       |                                                                                             |   |
|-----------------------|---------------------------------------------------------------------------------------------|---|
|                       | Trillium Health Partners                                                                    | 1 |
| <b>Chile</b>          | Clinica Los Carrera Quilpue                                                                 | 1 |
| <b>Czechia</b>        | Charles University and General University Hospital Prague                                   | 2 |
| <b>Denmark</b>        | Roskilde                                                                                    | 1 |
| <b>Dominican Rep.</b> | Hospital General Docente de la Policía Nacional                                             | 1 |
| <b>Ecuador</b>        | Hospital Eugenio Espejo                                                                     | 2 |
| <b>Egypt</b>          | Mansoura                                                                                    | 1 |
| <b>Estonia</b>        | Tartu University Hospital                                                                   | 1 |
| <b>Ethiopia</b>       | St. Paul's Hospital millennium medical college                                              | 1 |
| <b>Finland</b>        | Turku University Hospital                                                                   | 3 |
| <b>France</b>         | Centre Hospitalier Victor Dupouy Argenteuil                                                 | 1 |
|                       | ICU La Pitie-Salpetriere Hospital, Paris                                                    | 1 |
|                       | Lyon teaching hospital                                                                      | 1 |
|                       | St Louis hospital                                                                           | 1 |
| <b>Germany</b>        | Evangelisches Stadtkrankenhaus Saarbrücken, Großherzog-Friedrich-Str. 44, 66111 Saarbrücken | 1 |
|                       | Klinikum rechts der Isar, TU München                                                        | 1 |
|                       | Luebeck                                                                                     | 1 |
|                       | UKSH                                                                                        | 1 |
|                       | Universitätsklinikum Freiburg                                                               | 1 |
|                       | University Hospital of Cologne                                                              | 2 |
| <b>Honduras</b>       | Hospital Mario Rivas                                                                        | 1 |
| <b>Hungary</b>        | Péterfy Sándor hospital                                                                     | 1 |
| <b>India</b>          | AIIMS                                                                                       | 1 |
|                       | ESI hospital                                                                                | 1 |
|                       | HOD                                                                                         | 1 |
|                       | P D Hinduja Hospital                                                                        | 1 |
| <b>Indonesia</b>      | Awal Bros Hospital                                                                          | 1 |
| <b>Iran</b>           | Alzahra University hospital                                                                 | 1 |
|                       | Golestan universty of medical science                                                       | 2 |
|                       | Mazandaran University of medical sciences, school of medicine                               | 1 |
|                       | National Research Institute of Tuberculosis and Lung Disease                                | 1 |
|                       | Sabzevar medical univert                                                                    | 1 |
|                       | Shahid chamran hospital                                                                     | 1 |
|                       | SNMU                                                                                        | 1 |
| <b>Ireland</b>        | CUH                                                                                         | 1 |
|                       | Mater Hospital Dublin                                                                       | 1 |





# CHEST™ Online Supplement

|                                |                                                       |   |
|--------------------------------|-------------------------------------------------------|---|
|                                | RCSI hospitals, Our Lady of Lourdes Drogheda          | 1 |
| <b>Israel</b>                  | Carmel Medical Centre                                 | 1 |
|                                | Tel Aviv medical center                               | 1 |
| <b>Italy</b>                   | AOU Modena neuro intensive care                       | 1 |
|                                | ASL BI                                                | 1 |
|                                | ASL nord-ovest Toscana                                | 1 |
|                                | ASL VC                                                | 1 |
|                                | ASST Papa Giovanni XXIII - Bergamo                    | 1 |
|                                | Azienda Ospedaliera Universitaria Integrata di Verona | 1 |
|                                | Cotugno Hospital                                      | 1 |
|                                | Covid ICU AOU Policlinico Bari                        | 1 |
|                                | CSS                                                   | 1 |
|                                | Grosseto Tuscany                                      | 1 |
|                                | Irccs multimedica sesto san giovanni Milano           | 1 |
|                                | IRCCS Policlinico San Donato                          | 1 |
|                                | Mauro Scarlato Hospital Scafati (SA)                  | 1 |
|                                | OPBG                                                  | 1 |
|                                | Ospedale Maggiore Novara                              | 1 |
|                                | Padua Hospital                                        | 1 |
|                                | Public Hospital G.B Grassi                            | 1 |
|                                | San Gerardo Hospital - Monza                          | 3 |
|                                | Sant'Orsola University hospital                       | 1 |
|                                | Siracusa                                              | 1 |
| Treviglio Hospital ASSTBGOVEST | 1                                                     |   |
| <b>Jamaica</b>                 | University Hospital of the West Indies                | 1 |
| <b>Japan</b>                   | Ehime University                                      | 1 |
|                                | Gifu Prefectural General Medical Center               | 1 |
|                                | Hokkaido                                              | 1 |
|                                | japanese red-cross Ishinomaki hospital                | 1 |
|                                | Jikei Kashiwa Hospital                                | 1 |
|                                | Kameda Medical Center                                 | 1 |
|                                | Kimitsu Chuo Hospital                                 | 1 |
|                                | Kobe University hospital                              | 1 |
|                                | Nagasaki University Hospital                          | 1 |
|                                | Nagoya University Hospital                            | 1 |
|                                | National Defense Medical College Hospital             | 1 |
|                                | Sakai City Medical Center                             | 1 |



|                    |                                                 |   |
|--------------------|-------------------------------------------------|---|
|                    | Shizuoka Children's Hospital                    | 1 |
|                    | St. Marianna University School of Medicine      | 1 |
|                    | Takarazuka City Hospital                        | 1 |
|                    | Tokyo bay Urayasu-Ichikawa medical center       | 1 |
|                    | University of Tokyo                             | 1 |
|                    | Wakayama Medical University Hospital            | 1 |
| <b>Kuwait</b>      | Ameri - Hospital                                | 1 |
| <b>Malta</b>       | Mater dei hospital                              | 1 |
| <b>Mexico</b>      | Hospital Juárez de México                       | 1 |
| <b>Myanmar</b>     | ICU, Yangon General hospital, MyanmarHospita    | 2 |
| <b>Netherlands</b> | Antonius hospital                               | 1 |
|                    | Gelre Hospitals                                 | 1 |
|                    | OLVG Clinic, Amsterdam                          | 1 |
|                    | Radboudumc Nijmegen                             | 1 |
| <b>New Zealand</b> | Middlemore Hospital                             | 1 |
|                    | Northshore hospital                             | 1 |
|                    | PH                                              | 1 |
|                    | Taranaki base hospital                          | 1 |
| <b>Nigeria</b>     | Ahmadu Bello University Teaching Hospital Zaria | 1 |
| <b>Norway</b>      | Gjøvik Hospital                                 | 1 |
|                    | Haukeland University Hospital                   | 1 |
|                    | Oslo University Hospital                        | 8 |
| <b>Oman</b>        | Royal Hospital                                  | 1 |
| <b>Pakistan</b>    | Liaquat National Hospital                       | 1 |
|                    | SIUT HOSPITAL                                   | 2 |
| <b>Peru</b>        | Almenara ICU                                    | 1 |
|                    | Hospital cayetano heredia                       | 1 |
|                    | Hospital Edgardo Rebagliati Martins             | 1 |
|                    | National Institute of Neurological Science      | 1 |
| <b>Philippines</b> | Provincial Health Office                        | 1 |
|                    | The Medical City Hospital                       | 1 |
| <b>Poland</b>      | University Hospital, Krakow                     | 1 |
| <b>Portugal</b>    | Centro Hospitalar Universitario Sao Joao        | 1 |
|                    | CHTMAD                                          | 1 |
|                    | CHUSJ                                           | 1 |
| <b>Qatar</b>       | Hamad General Hospital                          | 1 |
| <b>Russia</b>      | Mariin Hospital SPb                             | 1 |



|                                          |                                                            |          |
|------------------------------------------|------------------------------------------------------------|----------|
|                                          | Northern State Medical University                          | 1        |
| <b>Saudi Arabia</b>                      | Alhada military hospital                                   | 1        |
| <b>Singapore</b>                         | CGH                                                        | 1        |
| <b>South Africa</b>                      | Tygerberg Hospital                                         | 2        |
|                                          | Asan Medical Center                                        | 1        |
|                                          | Chonbuk National University                                | 1        |
|                                          | SAMSUNG SEOUL HOSPITAL                                     | 1        |
|                                          | Seoul National University Hospital                         | 1        |
|                                          | Yonsei University Wonju Severance Christian Hospital       | 1        |
| <b>Spain</b>                             | Clínica Diagonal - Esplugues - Spain                       | 1        |
|                                          | CUN Pamplona                                               | 1        |
|                                          | Hospital Universitario Son Llatzer                         | 1        |
|                                          | Hospital Costa del Sol                                     | 1        |
|                                          | Hospital de Huerca-Overa                                   | 1        |
|                                          | Hospital La Paz                                            | 2        |
|                                          | Hospital Puerta del Mar                                    | 1        |
|                                          | Hospital Universitario de Torre Vieja                      | 1        |
|                                          | HOSPITAL UNIVERSITARIO SON LLATZER                         | 1        |
|                                          | HUA                                                        | 1        |
|                                          | <b>Sweden</b>                                              | Nyköping |
| University Hospital Umeå, Intensive care |                                                            | 1        |
| <b>Switzerland</b>                       | EOC La Carità                                              | 1        |
|                                          | Réseau hospitalier neuchâtelois                            | 1        |
| <b>Thailand</b>                          | chulalongkorn university                                   | 1        |
|                                          | HRH Mahachakri Sirindhorn Medical Center                   | 1        |
| <b>Turks and Caicos Islands</b>          | Cheshire hall Medical center of Turks an Caicos            | 1        |
| <b>United Kingdom</b>                    | Aberdeen Royal Infirmary                                   | 2        |
|                                          | Aneurin Bevan Health Board / Royal Gwent hospital, Newport | 2        |
|                                          | Barts health                                               | 1        |
|                                          | BHR Nhs trust                                              | 1        |
|                                          | Critical care ta the Pruh, Kings health are trust          | 1        |
|                                          | Croydon university hospital                                | 1        |
|                                          | Derriford hospital                                         | 1        |
|                                          | District General Hospital                                  | 2        |
|                                          | Ealing Hospital                                            | 1        |
| Epsom and St Heliers                     | 1                                                          |          |



# CHEST™ Online Supplement

|                                 |                                                     |   |
|---------------------------------|-----------------------------------------------------|---|
|                                 | ESNEFT                                              | 1 |
|                                 | Guy's & St Thomas NHS Foundation Trust              | 1 |
|                                 | Ipswich Hospital                                    | 2 |
|                                 | Kings college                                       | 1 |
|                                 | Maidstone Hospital, Kent                            | 1 |
|                                 | National Hospital for Neurology & Neurosurgery      | 2 |
|                                 | Newcastle Hospitals NHS Trust                       | 1 |
|                                 | Newcastle upon Tyne hospitals                       | 1 |
|                                 | NHS Dumfries and Galloway                           | 3 |
|                                 | North Bristol NHS Trust                             | 3 |
|                                 | Nottingham university hospitals                     | 1 |
|                                 | Oxford Hospital                                     | 1 |
|                                 | Royal Berkshire Hospital                            | 1 |
|                                 | Royal Brompton hospital                             | 1 |
|                                 | Scarborough Hospital, North Yorkshire, UK NHS Trust | 1 |
|                                 | Sherwood forest NHS trust                           | 1 |
|                                 | Southampton                                         | 1 |
|                                 | UCLH                                                | 1 |
|                                 | UHB                                                 | 1 |
|                                 | Uhcw                                                | 1 |
|                                 | University College London                           | 1 |
|                                 | University hospital of wales                        | 1 |
|                                 | University Southampton General hospital             | 1 |
|                                 | Wrexham Maelor Hospital UK                          | 1 |
| <b>United States of America</b> | Advocate Christ Medical Center                      | 1 |
|                                 | Advocate Illinois Masonic medical center            | 1 |
|                                 | Albany Medical Center                               | 2 |
|                                 | Ascension Seton Medical Center Austin               | 1 |
|                                 | Asension Seton                                      | 1 |
|                                 | Astria sunnyside                                    | 1 |
|                                 | At Joseph Medical center                            | 1 |
|                                 | Atrium Health                                       | 1 |
|                                 | Banner Casa Grande Medical Center                   | 1 |
|                                 | Baptist Health Neurosurgery                         | 1 |
|                                 | Baptist Hospital of Miami                           | 1 |
|                                 | Baptist memorial Jackson                            | 1 |
|                                 | Beaumont Health                                     | 1 |



# CHEST™ Online Supplement

|                                              |    |
|----------------------------------------------|----|
| Beaumont Hospital                            | 1  |
| Beth Israel Deaconess Medical Center         | 2  |
| Bethesda Covid hospital                      | 1  |
| Boston Children's Hospital                   | 1  |
| Brigham and Women's Hospital                 | 9  |
| Brigham Women's Faulkner                     | 1  |
| Bronson Methodist Hospital                   | 2  |
| Buffalo General                              | 1  |
| Cedars Sinai                                 | 1  |
| CHLA                                         | 1  |
| Christus st Patrick hospital                 | 2  |
| Christus St. Vincent regional medical center | 1  |
| Columbia University Medical Center           | 5  |
| Covenant Healthcare                          | 1  |
| CVMC                                         | 1  |
| Dartmouth-Hitchcock Medical Center           | 2  |
| DCH Regional Medical Center in Tuscaloosa    | 1  |
| Denver Health                                | 1  |
| detroit medical center                       | 2  |
| DHMC                                         | 1  |
| Dignity Health St. Joseph's Hospital         | 1  |
| Duke University Hospital                     | 14 |
| Durham Veterans Affairs Medical Center       | 1  |
| Einstein Medical Center                      | 1  |
| El Camino Hospital                           | 1  |
| Emanuel hospital                             | 1  |
| Eskenazi Health                              | 1  |
| Evergreen Hospital ICU                       | 2  |
| Fairview                                     | 1  |
| Fawcett Memorial Hospital                    | 1  |
| Flagstaff Medical Center                     | 1  |
| Gateway Regional Medical Center              | 1  |
| Genesis Medical Center                       | 1  |
| Good Samaritan Hospital                      | 3  |
| Grady                                        | 1  |
| Harborview Medical Center                    | 21 |
| Henry Ford Hospital                          | 2  |



# CHEST™ Online Supplement

|                                       |    |
|---------------------------------------|----|
| HFAH                                  | 1  |
| Highline Medical Center               | 1  |
| HMH                                   | 1  |
| Honor health                          | 2  |
| Hunter-Holmes McGuire VAMC            | 1  |
| ICU/ hospital in Eau Claire WI        | 1  |
| Indian Resevation                     | 1  |
| Inova Loudoun Hospital                | 2  |
| Intermountain Medical Center          | 7  |
| IU Health Methodist Hospital          | 5  |
| Johns Hopkins Hospital                | 1  |
| Kadlec Regional Medical Center        | 5  |
| Kaiser Zion                           | 1  |
| Keck Hospital of USC                  | 2  |
| LAC+USC Medical Center                | 1  |
| Lahey Hospital & Medical Center       | 2  |
| Lake Norman Regional Medical Center   | 1  |
| Lawrence General Hospital             | 1  |
| LDS Hospital ICU                      | 1  |
| Legacy Emanuel                        | 1  |
| Legacy Good Samaritan Medical Center  | 1  |
| Legacy Salmon Creek Hospital          | 3  |
| Lehigh Valley Hospital- Cedar Crest   | 1  |
| Loma Linda University Medical Center  | 1  |
| LSU Health Sciences Center            | 2  |
| M Health Fairview St. John's Hospital | 1  |
| Maine Medical Center                  | 1  |
| Massachusetts General Hospital        | 24 |
| Mather Hospital                       | 1  |
| McGuire VA hospital, Richmind VA      | 1  |
| McKay Dee Hospital, ICU               | 1  |
| Mercy Hospital OKC                    | 2  |
| Mercy Hospital South                  | 1  |
| Mercy Medical Center                  | 1  |
| Methodist Hospital                    | 1  |
| Montefiore Medical Center             | 1  |
| Mount Sinai                           | 14 |



# CHEST™ Online Supplement

|                                             |   |
|---------------------------------------------|---|
| MSTICU                                      | 1 |
| MU Health                                   | 1 |
| Multi care Tacoma General                   | 1 |
| Multicare Auburn Medical Center             | 1 |
| Multicare Deaconess Hospital                | 1 |
| Multicare Good Samaritan Hospital           | 3 |
| MultiCare Health Systems                    | 1 |
| MUSC                                        | 1 |
| National Jewish / St Joseph Hospital        | 7 |
| National Jewish Health, Rose Medical Center | 1 |
| New York Presbyterian Columbia University   | 6 |
| New york Presbyterian weill cornell         | 2 |
| NKC                                         | 1 |
| North Memorial                              | 1 |
| North Shore Medical Center Salem Hospital   | 1 |
| North Shore University Hospital             | 1 |
| Northern Westchester Hospital               | 1 |
| Northside-Cherokee                          | 1 |
| Northwestern Memorial Hospital              | 5 |
| Norwalk Hospital                            | 7 |
| NYP/Q                                       | 1 |
| Nyu                                         | 1 |
| NYUWinthrop                                 | 1 |
| Ochsner/university                          | 1 |
| OHSU                                        | 2 |
| Olive View-UCLA Medical Center              | 1 |
| OMHC                                        | 1 |
| ORMC                                        | 1 |
| OSF Peoria                                  | 1 |
| OSF St Mary Medical Center                  | 1 |
| OSFSFMC                                     | 1 |
| Overlake                                    | 6 |
| Palomar Medical Center Escondido CA         | 1 |
| PCCM                                        | 1 |
| Peacehealth Southwest                       | 3 |
| Phoebe Putney                               | 1 |
| PHSW                                        | 1 |



# CHEST™ Online Supplement

|                                                       |    |
|-------------------------------------------------------|----|
| Piedmont Atlanta                                      | 1  |
| PRMCE                                                 | 1  |
| Providence Everett                                    | 1  |
| Providence regional medical center                    | 8  |
| Providence Spokane Hospitals                          | 1  |
| Queens Medical Center                                 | 1  |
| Regions Hospital                                      | 2  |
| Rhode island hospital                                 | 1  |
| Riverside university health system                    | 1  |
| Rush Oak Park Hospital                                | 2  |
| Rush university medical center                        | 2  |
| Rutgers NJMS                                          | 3  |
| Sacred Heart Medical Center Riverbend                 | 1  |
| Saint Luke's Hospital of Kansas City                  | 1  |
| Salem Health Hospital                                 | 1  |
| Samaritan Albany General Hospital                     | 1  |
| San Francisco VA Health Care System                   | 1  |
| Santa Monica-UCLA Medical Center                      | 4  |
| Scripps Green and Scripps Memorial La Jolla Hospitals | 1  |
| Seattle Childrens Hospital                            | 1  |
| Sentara                                               | 1  |
| Shands Childrens Hospital                             | 1  |
| Sharp Memorial Hospital                               | 2  |
| Skagit Valley Hospital                                | 1  |
| South Eastern Indiana ICU                             | 1  |
| SSMHealth                                             | 1  |
| St Anthony Hospital                                   | 1  |
| St Johns Hospital                                     | 2  |
| St Joseph Medical Center                              | 5  |
| St. Anthony Hospital                                  | 1  |
| St. Clair Hospital                                    | 1  |
| St. Luke's Hospital                                   | 1  |
| St. Peter's hospital                                  | 1  |
| Stanford                                              | 7  |
| SUNY Downstate                                        | 1  |
| SUNY Upstate                                          | 1  |
| Swedish First Hill                                    | 10 |





# CHEST™ Online Supplement

|                                           |    |
|-------------------------------------------|----|
| Swedish Cherry Hill                       | 5  |
| Swedish Edmonds                           | 1  |
| Tacoma General                            | 1  |
| Tempe St Lukes                            | 1  |
| Tuba city regional healthcare corporation | 1  |
| Tulane Medical Center                     | 2  |
| U of M Mott Children's Hospital           | 4  |
| U. of New Mexico                          | 1  |
| UAB                                       | 1  |
| UAMS                                      | 3  |
| UC Davis                                  | 5  |
| UCDMC                                     | 1  |
| UCLA                                      | 29 |
| UCLA Ronald Raegan                        | 8  |
| UCLA/LA County                            | 1  |
| UCONN Health John Dempsy                  | 1  |
| UCSD                                      | 4  |
| UCSF                                      | 2  |
| UIHC                                      | 2  |
| UMass Memorial                            | 1  |
| UMCNO                                     | 1  |
| UMMC                                      | 1  |
| University of California, Davis           | 1  |
| University of Cincinnati                  | 2  |
| University of Colorado                    | 5  |
| University of Iowa Hospitals and Clinic   | 1  |
| University of Kouisville Hospital         | 1  |
| University of Michigan                    | 36 |
| University of Minnesota                   | 3  |
| university of Mississippi Medical Center  | 1  |
| University of New Mexico Hospital         | 4  |
| University of Pennsylvania                | 3  |
| University of Southern California         | 1  |
| University of Utah                        | 1  |
| University of Vermont Medical Center      | 11 |
| University of Virginia                    | 1  |
| University of Washington Montlake         | 3  |



# CHEST™ Online Supplement

|                |                                   |    |
|----------------|-----------------------------------|----|
|                | UNMH                              | 10 |
|                | UPMC                              | 1  |
|                | URHCS                             | 1  |
|                | Utah Valley Hospital              | 1  |
|                | UVM MEDICAL CENTER                | 13 |
|                | UW Valley medical center          | 2  |
|                | uwmc Northwest                    | 1  |
|                | VA Portland Healthcare System     | 1  |
|                | VA Puget Sound HCS                | 1  |
|                | Valley medical center             | 2  |
|                | VCU Medical Center                | 12 |
|                | Virginia Mason Memorial Hospital  | 5  |
|                | Washington University in St.Louis | 1  |
|                | Wellspan Chambersburg Hospital    | 1  |
|                | West Florida hospital             | 1  |
|                | West Penn Hospital                | 1  |
|                | WFBH Wilkes Medical               | 1  |
|                | Yale-New Haven Hospital           | 7  |
|                | ZSFG                              | 1  |
|                | Ridgeview Medical Center          | 1  |
|                | Tufts                             | 1  |
| <b>Uruguay</b> | AMDM IAMPP                        | 1  |

# CHEST™ Online Supplement

## COVID-19 3-S Full survey:

Electronic Link: <https://redcap.link/covid19.icu.survey>

Thank you for taking the survey below. Your participation is completely anonymous, and we will not record personal data.

### Respondent information

1. Do you directly care for COVID-19 patients requiring intensive care?  
 yes  no (if no exclude)

2. I have personally cared for:

< 10

10-50

>50

COVID-19 patients in the ICU

3. What country do you practice in?  
(drop down menu)

4. IF USA: state (drop down menu)

5. Institution: My primary clinical practice I work at is: (optional)

6. What is your gender?  female  male  non-binary  prefer not to say

7. What is your role at your hospital?

physician director of the ICU

attending physician/consultant

physician in training (resident/fellow)

nurse manager of the ICU

nurse

clinical nurse specialist/clinical nurse educator

advanced practice provider (nurse practitioner or physician assistant)

respiratory therapist

other: [free text]

8. As a physician, what is your area of specialization (check all that apply):

Critical Care Medicine/Intensivist

Pulmonology

Infectious Disease

Anesthesiology

Emergency Medicine

Cardiology

Nephrology

Internal Medicine

Family Medicine

Surgery

- Pediatrics
- Neurology
- Palliative Care
- other: [free text]

9. As a physician in training, what is your area of specialization (check all that apply):

- Critical Care Medicine/Intensivist
- Pulmonology
- Infectious Disease
- Anesthesiology
- Emergency Medicine
- Cardiology
- Nephrology
- Internal Medicine
- Family Medicine
- Surgery
- Pediatrics
- Neurology
- Palliative Care
- other: [free text]

10. What is your clinical nursing area of specialization (check all that apply):

- Intensive Care Unit
  - Medical
  - Cardiac
  - Pulmonary
  - Neurocritical Care
  - Trauma
  - Surgical
  - Burns
  - Pediatric
- Outside of Intensive Care Unit

11. Years in Clinical Practice (includes time in residency and fellowship): [enter number]

#### Staffing

12. Physician availability

At my hospital:

- we have an appropriate number of intensivists to care for all COVID-19 patients in the ICU (y/n)
- we have an appropriate number of intensivists to care for other patients requiring ICU care (y/n)

IF NO checked for question 12, ask

13. How does your hospital manage the shortage of intensivists (check all that apply)?

- non-intensivists care for COVID-19 patients in the ICU
- non-intensivists care for other patients requiring ICU
- COVID-19 patients have to be moved to other hospitals because of a shortage of intensivists

- other patients requiring ICU care have to be moved to other hospitals because of a shortage of intensivists  
 other: [free text]

14. Nursing availability:

At my hospital:

- we have an appropriate number of ICU nurses to care for all COVID-19 patients in the ICU (y/n)
- we have an appropriate number of ICU nurses to care for all other patients requiring ICU care (y/n)

IF NO checked for question 14, ask

15. How does your hospital manage the shortage of ICU nurses (check all that apply)?

- ICU nurses are caring for patient populations outside of their usual practice
- non-ICU nurses are caring for COVID-19 patients due to a shortage of ICU nurses
- non-ICU nurses are caring for other patients requiring ICU care due to a shortage of ICU nurses
- ICU nurses must care for more patients than prior to the pandemic
- we contract traveler/agency nurses
- COVID-19 patients have to be moved to other hospitals because of a shortage of ICU nurses
- other patients requiring ICU care have to be moved to other hospitals because of a shortage of ICU nurses
- other: [free text]

Resources

16. Testing availability

In my hospital, testing for COVID-19 is available for:

- all patients
- select patients (specific symptoms or risk factors)
- no patients
- I do not know

17. In my hospital, testing for COVID-19 is available for:

- all health care personnel
- available for select health care personnel  
(specific symptoms, risk factors, or working in high-risk areas)
- no health care personnel
- I do not know

18. In my hospital, testing can be ordered

- without any restrictions
- restricted to approval at hospital level
- restricted to approval at governmental level
- not available

19. Personal Protective Equipment

During the COVID-19 pandemic, my hospital provides

(options: always available, reserved for select providers, available based on patient characteristics, intermittently available based on supplies, not at all available):

- cloth mask

# CHEST™ Online Supplement

- surgical mask
- high filtration N95 or greater efficiency mask (eg FFP2 or FFP3)
- dedicated eye protection
- face shield
- powered air purifying respirator (PAPR, CAPR)
- gown or plastic apron
- gloves

20. I feel that my hospital's policy and practices of using personal protective equipment is appropriate and safe for all health care workers:

- agree completely
- agree somewhat
- disagree somewhat
- disagree completely

21. Ventilators/oxygen supply: in the foreseeable to the near future (1-2 weeks) at my hospital, we have (check all that apply):

OPTIONS FOR EACH:

for all patients who need them, for select patients, not available, I don't know

- mechanical ventilators
- noninvasive positive pressure ventilation (BIPAP/CPAP)
- oxygen concentrator
- tank oxygen
- high flow nasal cannula

IF ventilators not available for all patients:

22. At my hospital, patients share ventilators  yes  no

23. At my hospital, we limit the use of invasive mechanical ventilation in COVID-19 patients to:  yes  no

IF checked yes in 22:

23. we limit the use of invasive mechanical ventilation to patients

(check all that apply)

- below a certain age
- without certain comorbidities
- with health insurance or financial means
- with a certain degree of clinical severity, e.g. SOFA score
- other limitations: [free text]

24. Cardiopulmonary resuscitation (CPR):

- Our hospital policy and practice about CPR and DNR has not changed from prior to COVID-19
- We have implemented a new policy about CPR and DNR for COVID-19 patients
- There has been no change in hospital policy, but clinical practice about CPR and DNR is different in COVID-19 patients

if checked 2 or 3, ask:

25.

- we don't perform CPR in our COVID-19 patients

- we perform CPR in select COVID-19 patients as determined by treating physicians
- we perform CPR in COVID-19 patients based upon patient or family wishes

IF checked option 2 or 3:

26. we limit the use of CPR to COVID-19 patients

- below a certain age
- without certain comorbidities
- with health insurance or financial means
- with a certain degree of clinical severity
- other [free text]

27. When critical decisions have to be made for COVID-19 patients around withholding or withdrawing life-sustaining treatments, we allow families/legal surrogates to participate in the shared decision making process:

- more
- same
- less

compared to other ICU patients

28. Which of the following management strategies have been used in critically ill COVID-19 patients at your hospital (check all that apply)?

- Proning
- ECMO
- Drugs under investigation
- Renal replacement therapy
- Other: [free text]

29. We are limiting the use of the following diagnostic tests and procedures in COVID-19 patients:

Matrix: not performed, performed in select cases, performed as prior to COVID-19, not available at my hospital, I do not know

- ultrasound
- cardiac echo
- CT
- MRI
- bronchoscopy
- thoracentesis
- paracentesis
- lumbar punctures
- electroencephalography

30. We consult palliative care specialists for

- More than half of our COVID-19 patients in the ICU
- Less than half of our COVID-19 patients in the ICU
- we don't consult palliative care in our COVID-19 patients in the ICU
- we don't have palliative care specialists in our hospital

If checked 1 or 2: This is

31.  
 More  Same  Less  
than we have consulted palliative care in our ICU before COVID
32. For other ICU patients in my hospital (presenting with conditions other than COVID-19), I have observed (check all that apply):
- delays in obtaining emergent tests
  - delays in emergent procedures
  - reduced availability of relevant specialists
  - reduced willingness of consulting specialists to see the patient
  - reduced nursing care
  - less frequent exams
  - less time with doctors
  - less time with nurses
  - less time with patients' families
  - less physical therapy
  - other [FREE TEXT]
32. For non-COVID-19 patients in my ICU, the pandemic has resulted in
- improved level of care
  - the same level of care compared to before
  - worse level of care

Space

33. With regards to intensive care beds:
- we have sufficient intensive care beds for our COVID-19 patients (y/n)
  - we have sufficient beds for other patients requiring intensive care beds (y/n)

IF checked no for either:

34. To create ICU beds we have converted (check all that apply):
- an unrelated specialty ICU to a COVID-19 unit and the specialty patients were relocated to other unit(s)
  - other hospital beds
  - operating rooms
  - emergency rooms
  - post-OP recovery rooms
  - outpatient areas
  - we have created new free-standing structures (such as external tents) to accommodate all patients
  - critical care beds to accommodate more patients than originally designed
35. Due to insufficient space, we have:
- moved COVID-19 patients to other hospitals
  - moved non-COVID-19 patients requiring intensive care to other hospitals
  - refused transfer requests for COVID-19 patients
  - refused transfer requests for non-COVID-19 patients



## Clinical Education

36. Residents and fellows can opt out of participating in the care of patients with COVID-19  
 yes  no  I don't know

37. Overall, at my hospital, the effect of the COVID-19 crisis on clinical education and training of residents and fellows is:  
 positive  no changes  negative  there are no residents or fellows at my hospital

38. Compared to before the COVID-19 pandemic, medical trainees (residents and fellows) at my hospital:

Matrix (more, same, less, no trainees)

- work with appropriate supervision from an attending physician
- are asked to make medical decisions that exceed their level of competence
- are reassigned to work in areas that are not their primary field they train in
- have formal teaching and didactics
- get opportunities to directly perform invasive procedures

## Effects on health care professionals

39. At my hospital, caring for COVID-19 patients is  
 optional, with possibilities to work in other areas  
 optional, but forced to use vacation or decreases in salary if I opt out  
 mandatory

40. My concerns in caring for COVID-19 patients are (check all that apply):  
 insufficient access to personal protective equipment  
 feeling as if my hospital is unable to keep providers safe  
 poor communication from my supervisors  
 worries about my own health  
 carrying infection home to my family and community  
 social stigma from my community outside of the hospital  
 witnessing colleagues at my hospital contract COVID-19  
 learning about other health care providers contracting COVID-19 in the news  
 emotional distress and burnout  
 no concerns  
 other: [free text]

41. When not working in the hospital, I:  
 live separately from my family to protect them  
 completely isolate myself from family members living in my household  
 partially isolate myself from family members living in my household  
 do not isolate myself from family members but take extra precautions  
 have not changed anything about my personal life at home

#### List of Critical Care Societies Distributing the Survey Link

World Federation of Intensive and Critical Care (WFICC), American Association of Critical Care Nurses (AACN), Australian & New Zealand Intensive Care Society (ANZICS), American Thoracic Society (ATS), British association of critical care nurses (BACCN), Bangladesh Society of Critical Care Medicine, Canadian Critical Care Society (CCCS), Deutsche Interdisziplinäre Vereinigung für Intensiv- und Notfallmedizin (DIVI), European Society of Intensive Care Medicine (ESICM – Ethics section), Russian Federation of Anesthesiologists and Reanimatologists (FAR), Japanese Society of Intensive Care Medicine, Neurocritical Care Society (NCS), Società Italiana di Anestesia Analgesia Rianimazione e Terapia Intensiva (SIAARTI), La Sociedad Española de Medicina Intensiva, Crítica y Unidades Coronarias (Semi-CYUC), Thai Critical Care Society.

203218
